# Supplementary material
Source: publisher site journal article supplement (https://www.degruyter.com/publication/journal_key/BIOL/downloadAsset/BIOL_EACR%20Goodbye%20Flat%20Biology%20Conference%202023.pdf)
Supplement: Supplementary file 1 [file BIOL_EACR%20Goodbye%20Flat%20Biology%20Conference%202023.pdf]

EACR Conference

DE  
G

# GOODBYE FLAT BIOLOGY

10 - 12 October 2023, Berlin

## **Short description:**

The EACR's fifth edition of Goodbye Flat Biology will focus on the next generation of cancer models and emerging topics in the areas of cell architecture, mechanobiology, the immune microenvironment, intravital imaging, and high-content analysis for cancer therapeutics. It will seek to emphasize complex 3D model systems that capture the dialogue between cancer cells, the cellular stroma (e.g. fibroblasts, immune cells), and the extracellular matrix, with a focus on how this dialogue affects cancer progression and treatment response. Keynote lectures will be provided by Erik Sahai from the Crick Institute, Matthias Lütolf from EPFL, and Anne Rios from the Princess Máxima Center for Pediatric Oncology.

## **Speakers:**

Emmanuel Donnadieu (Institut Cochin, France), Andrew Ewald (Johns Hopkins University, USA), Peter Friedl (Radboud UMC, Netherlands), Jacky Goetz (INSERM, France), Bram Heijs (Leiden University, Netherlands), Henriëtte Lanz (MIMETAS, Netherlands), Matthias Lütolf (EPFL, Switzerland), Laura Machesky (University of Cambridge, UK), Leo Price (Crown Bioscience, Netherlands), Anne Rios (Princess Máxima Center, The Netherlands), Erik Sahai (Crick Institute, UK), Silvia Scaglione (React4Life, Italy), Daniela Thommen (NKI, The Netherlands), Paul Timpson (Garvan Institute, Australia), Britta Trappmann (Max Planck Institute, Germany), and Valerie Weaver (UCSF, USA)

***Conference website: [click here](#)***

*Contact Person: Chris Iliffe <[christopher.iliffe@eacr.org](mailto:christopher.iliffe@eacr.org)>*

**REGISTRATION  
DEADLINE:**

**01/09/2023**

**EACR**

European Association  
for Cancer Research

**PROMOTIONAL PARTNER:**

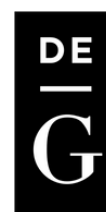

**DE GRUYTER**

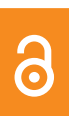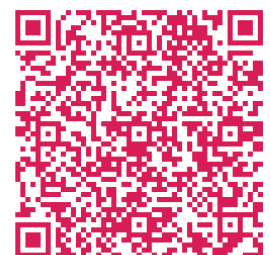

**REGISTER HERE**

[degruyter.com/biol](https://degruyter.com/biol)

EACR Conference

DE  
|  
G

# GOODBYE FLAT BIOLOGY

10 – 12 October 2023, Berlin

As a promotional partner of this meeting, De Gruyter's Open Access journal, Open Life Sciences, offers all participants a 30% discount for Article Processing Charges, for all manuscripts submitted before November 31st, 2023.

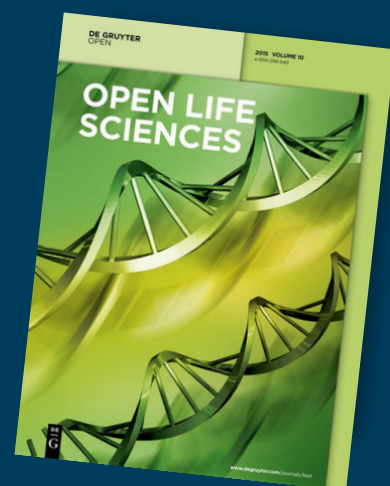

## How to submit

Authors are kindly invited to submit their contribution via online submission system Editorial Manager available at:

<https://www.editorialmanager.com/openbiol/default1.aspx>

SUBMISSION  
DEADLINE:

31/12/2023

Please remember to select: SI: GOODBYE FLAT BIOLOGY EACR 2023 to ensure that your manuscript is processed with the highest priority and that discount is applied.

PROMOTIONAL PARTNER

EACR

European Association  
for Cancer Research

DE  
|  
G

DE GRUYTER

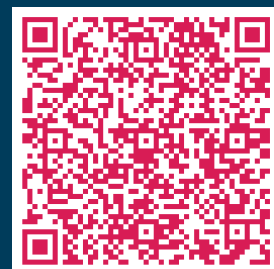

REGISTER HERE

[degruyter.com/biol](https://degruyter.com/biol)
